# Supplementary material for: Chemical and physical processes in the retention of functional groups in plasma polymers studied by plasma phase mass spectroscopy
Source: Royal Society of Chemistry journal article supplement (doi:10.1039/c5cp05850c), 2016-01-01
Supplement: c5cp05850c1.pdf [file c5cp05850c1.pdf]

# **Chemical and physical processes in the retention of functional groups in plasma polymers studied by plasma phase mass spectroscopy**

*Joonas Ryssy<sup>1</sup>, Eloni Prioste-Amaral<sup>2</sup>, Daniela F.N. Assuncao<sup>3</sup>, Nicholas Roger<sup>4,5</sup>, Giles T.S. Kirby<sup>4,5</sup>, Louise E. Smith<sup>5,6</sup>, Andrew Michelmores<sup>5,6\*</sup>*

1. School of Information Technology and Mathematical Sciences, University of South Australia, Mawson Lakes Campus, Mawson Lakes, SA, Australia, 5095

2. Department of Industrial Engineering, Universidade Federal de Sao Carlos, Sorocaba Campus, Highway John Leme dos Santos, Sao Paulo, 18052-780, Brazil

3. Department of Materials Engineering, Centro Federal de Educacao Tecnologica de Minas Gerais, 5253 Amazonas Avenue, Nova Suíça, 30480-000, Belo Horizonte, Brazil

4. Future Industries Institute, University of South Australia, Mawson Lakes Campus, Mawson Lakes, SA, Australia, 5095

5. Cooperative Research Centre for Cell Therapy Manufacturing, University of South Australia, Adelaide, South Australia 5000, Australia

6. School of Engineering, University of South Australia, Mawson Lakes Campus, Mawson Lakes, SA, Australia, 5095

\*For correspondence [andrew.michelmores@unisa.edu.au](mailto:andrew.michelmores@unisa.edu.au)

## Supporting Information

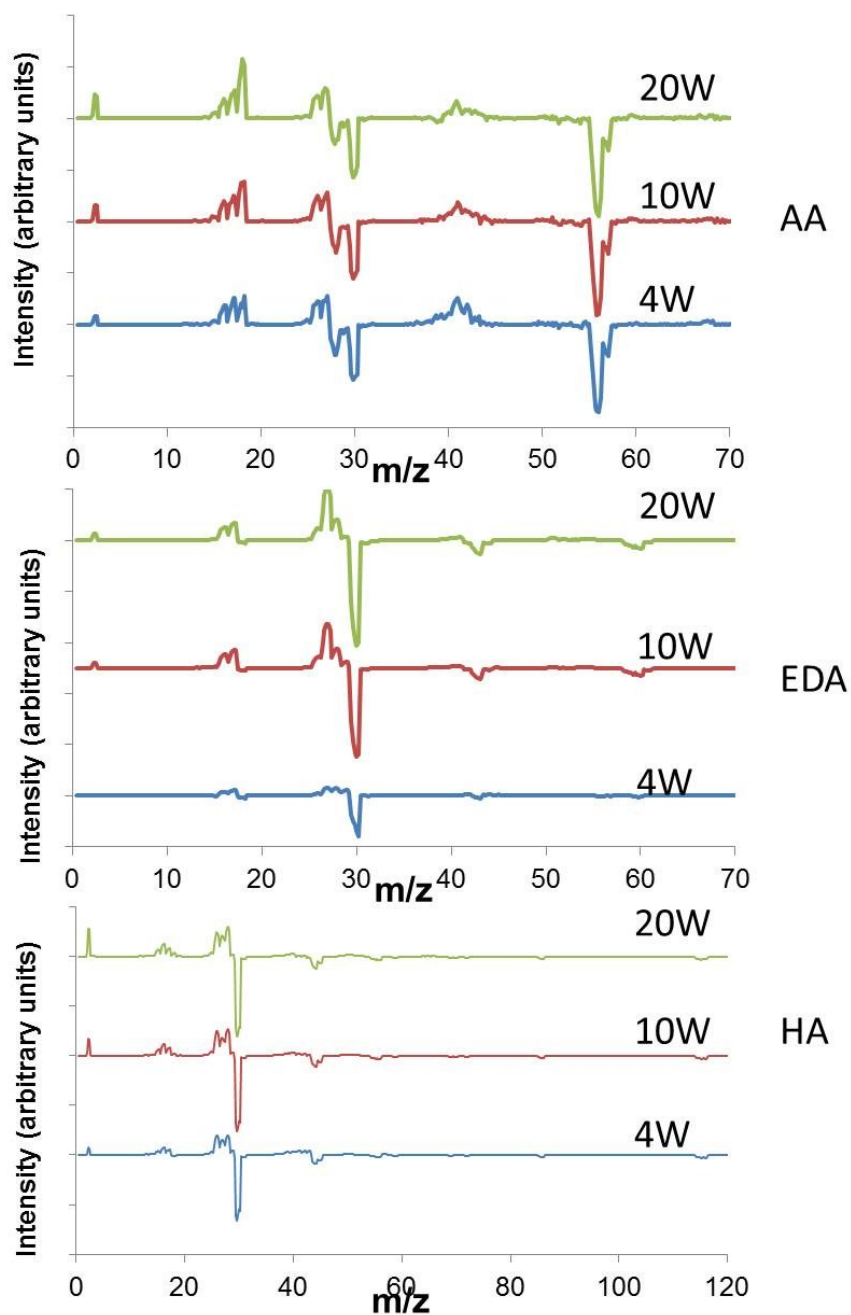

Figure S1. Change in neutral species distribution with applied power for AA (top), EDA (middle) and HA (bottom) compared to electron impact with no plasma.
